# Supplementary material for: Validation of a Simple HPLC-Based Method for Lysine Quantification for Ruminant Nutrition
Source: MDPI journal article supplement (doi:10.3390/molecules26144173), 2021-07-09
Supplement: s1 [file s1]

Table S1 – Variation results for both lysine (Lys) and internal standard (IS) of samples that were stored after derivatization, at 24 h, 48 h and 96 h of storage at room temperature (RT), 4 °C and -20 °C for Li<sub>2</sub>CO<sub>3</sub> buffer, phosphate buffer solution (PBS) and rumen inoculum, n = 5. Recovery was determined by dividing the peak area at each time point by the initial peak area (before storage) and the values are shown as mean ± standard deviation.

| Matrix                              | 24 h    |         | 48 h    |         | 96 h     |         |
|-------------------------------------|---------|---------|---------|---------|----------|---------|
|                                     | Lys     | IS      | Lys     | IS      | Lys      | IS      |
| Recovery (%) when stored at RT      |         |         |         |         |          |         |
| <b>Li<sub>2</sub>CO<sub>3</sub></b> | 98 ± 7  | 99 ± 6  | 69 ± 4  | 91 ± 4  | 70 ± 4   | 93 ± 6  |
| <b>PBS</b>                          | 84 ± 2  | 84 ± 2  | 88 ± 4  | 88 ± 4  | 23 ± 8   | 22 ± 8  |
| <b>Rumen</b>                        | 101 ± 5 | 101 ± 6 | 91 ± 8  | 92 ± 8  | 113 ± 6  | 115 ± 6 |
| Recovery (%) when stored at 4 °C    |         |         |         |         |          |         |
| <b>Li<sub>2</sub>CO<sub>3</sub></b> | 101 ± 5 | 100 ± 5 | 83 ± 12 | 88 ± 26 | 84 ± 16  | 68 ± 40 |
| <b>PBS</b>                          | 84 ± 1  | 87 ± 2  | 83 ± 6  | 83 ± 6  | 87 ± 8   | 87 ± 8  |
| <b>Rumen</b>                        | 99 ± 2  | 100 ± 4 | 93 ± 7  | 92 ± 7  | 105 ± 13 | 78 ± 13 |
| Recovery (%) when stored at -20 °C  |         |         |         |         |          |         |
| <b>Li<sub>2</sub>CO<sub>3</sub></b> | 51 ± 12 | 21 ± 20 | 37 ± 4  | 10 ± 3  | 38 ± 3   | 11 ± 2  |
| <b>PBS</b>                          | 94 ± 14 | 94 ± 6  | 36 ± 7  | 9 ± 6   | 34 ± 16  | 9 ± 2   |
| <b>Rumen</b>                        | 37 ± 6  | 8 ± 1   | 32 ± 8  | 12 ± 4  | 32 ± 14  | 9 ± 5   |

Table S2 – Variation results for both lysine (Lys) and internal standard (IS) of samples that were stored prior to derivatization, at 24 h, 48 h and 96 h of storage at room temperature (RT), 4 °C and -20 °C for Li<sub>2</sub>CO<sub>3</sub> buffer, phosphate buffer solution (PBS) and rumen inoculum, n = 5. Recovery was determined by dividing the peak area at each time point by the initial peak area (before storage) and the values are shown as mean ± standard deviation.

| Matrix                              | 24 h     |         | 48 h     |          | 96 h     |         |
|-------------------------------------|----------|---------|----------|----------|----------|---------|
|                                     | Lys      | IS      | Lys      | IS       | Lys      | IS      |
| Recovery (%) when stored at RT      |          |         |          |          |          |         |
| <b>Li<sub>2</sub>CO<sub>3</sub></b> | 227 ± 23 | 56 ± 6  | 80 ± 8   | 17 ± 2   | 144 ± 19 | 10 ± 10 |
| <b>PBS</b>                          | 82 ± 9   | 39 ± 4  | 106 ± 7  | 18 ± 1   | 78 ± 24  | 70 ± 19 |
| <b>Rumen</b>                        | 133 ± 24 | 2 ± 1   | 94 ± 8   | 1 ± 1    | 4 ± 5    | 5 ± 6   |
| Recovery (%) when stored at 4 °C    |          |         |          |          |          |         |
| <b>Li<sub>2</sub>CO<sub>3</sub></b> | 177 ± 11 | 90 ± 6  | 82 ± 4   | 63 ± 3   | 118 ± 4  | 55 ± 2  |
| <b>PBS</b>                          | 93 ± 5   | 80 ± 3  | 104 ± 7  | 62 ± 4   | 74 ± 7   | 39 ± 4  |
| <b>Rumen</b>                        | 42 ± 4   | 31 ± 4  | 44 ± 3   | 59 ± 4   | 136 ± 31 | 2 ± 1   |
| Recovery (%) when stored at -20 °C  |          |         |          |          |          |         |
| <b>Li<sub>2</sub>CO<sub>3</sub></b> | 150 ± 14 | 98 ± 7  | 95 ± 22  | 97 ± 6   | 116 ± 16 | 97 ± 7  |
| <b>PBS</b>                          | 96 ± 14  | 96 ± 7  | 111 ± 9  | 91 ± 7   | 78 ± 24  | 70 ± 19 |
| <b>Rumen</b>                        | 137 ± 28 | 94 ± 17 | 145 ± 26 | 103 ± 16 | 160 ± 31 | 97 ± 17 |
